# Supplementary material for: ChinaCropPhen1km: A high-resolution crop phenological dataset forthree staple crops in China during 2000–2015 based on LAI products
Source: Copernicus journal article supplement (doi:10.5194/essd-2019-110), 2019-08-21
Supplement: Supplementary file 1 [file essd-2019-110-supplement.pdf]

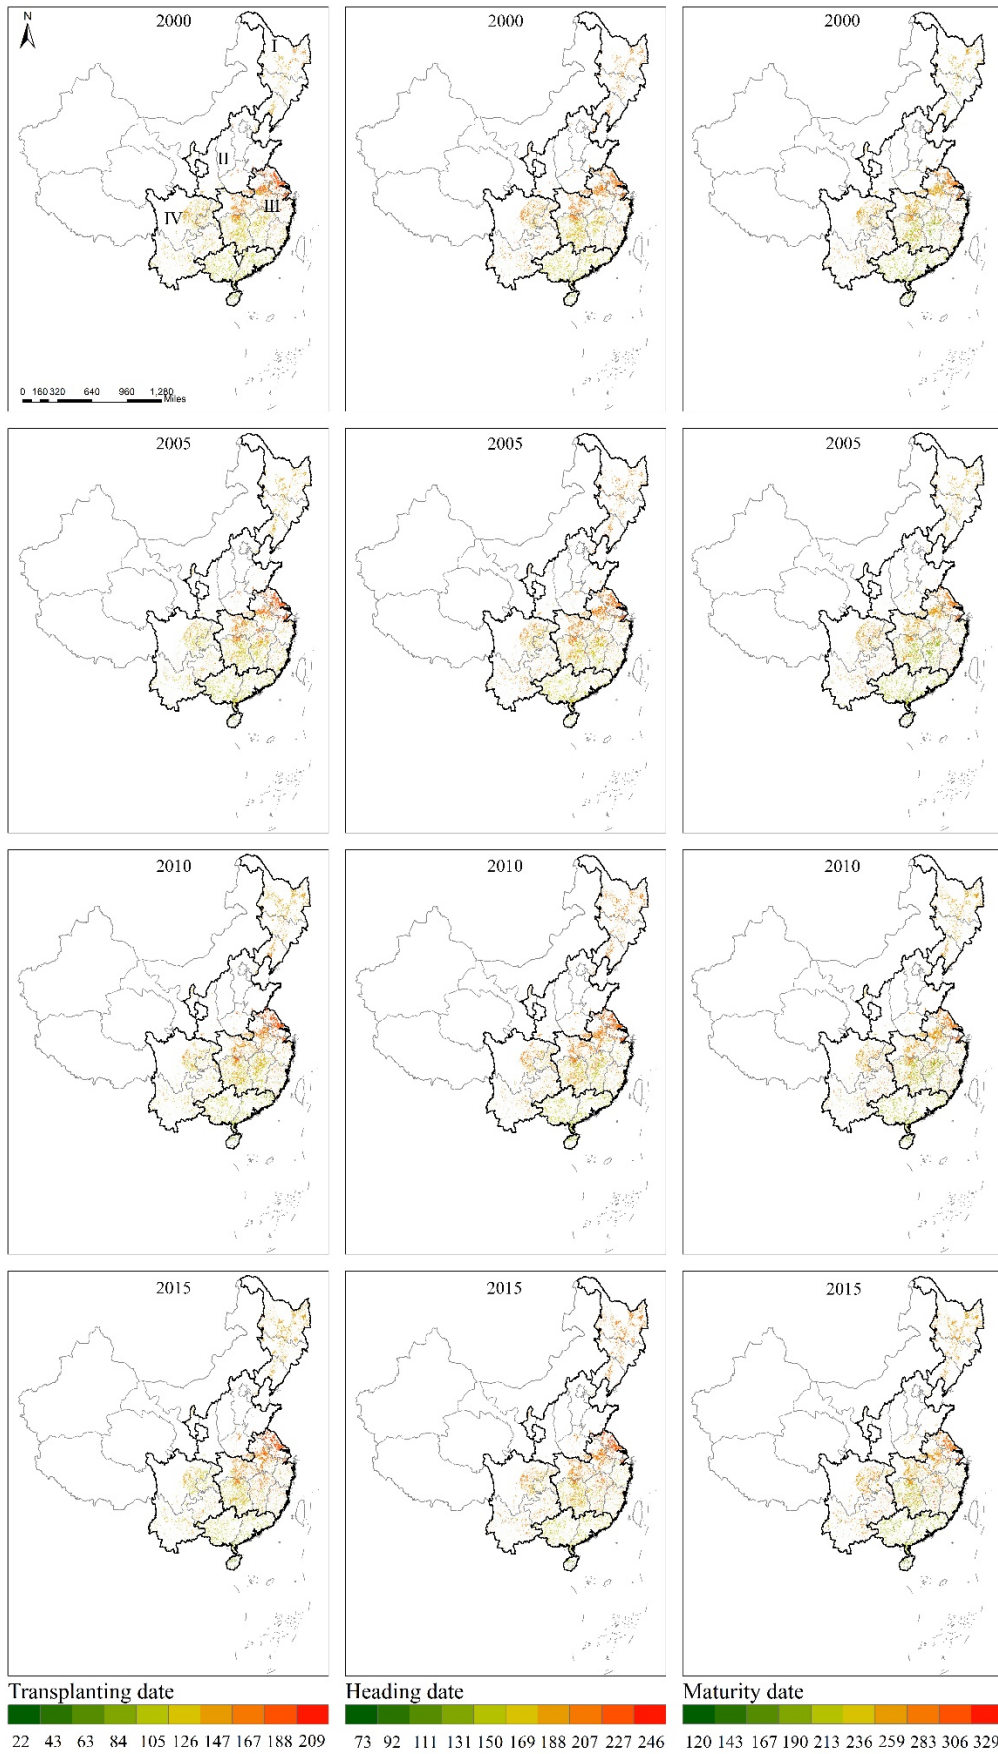

Fig. S1 Spatial patterns of annual three key phenological dates during 2000~2015 for rice.

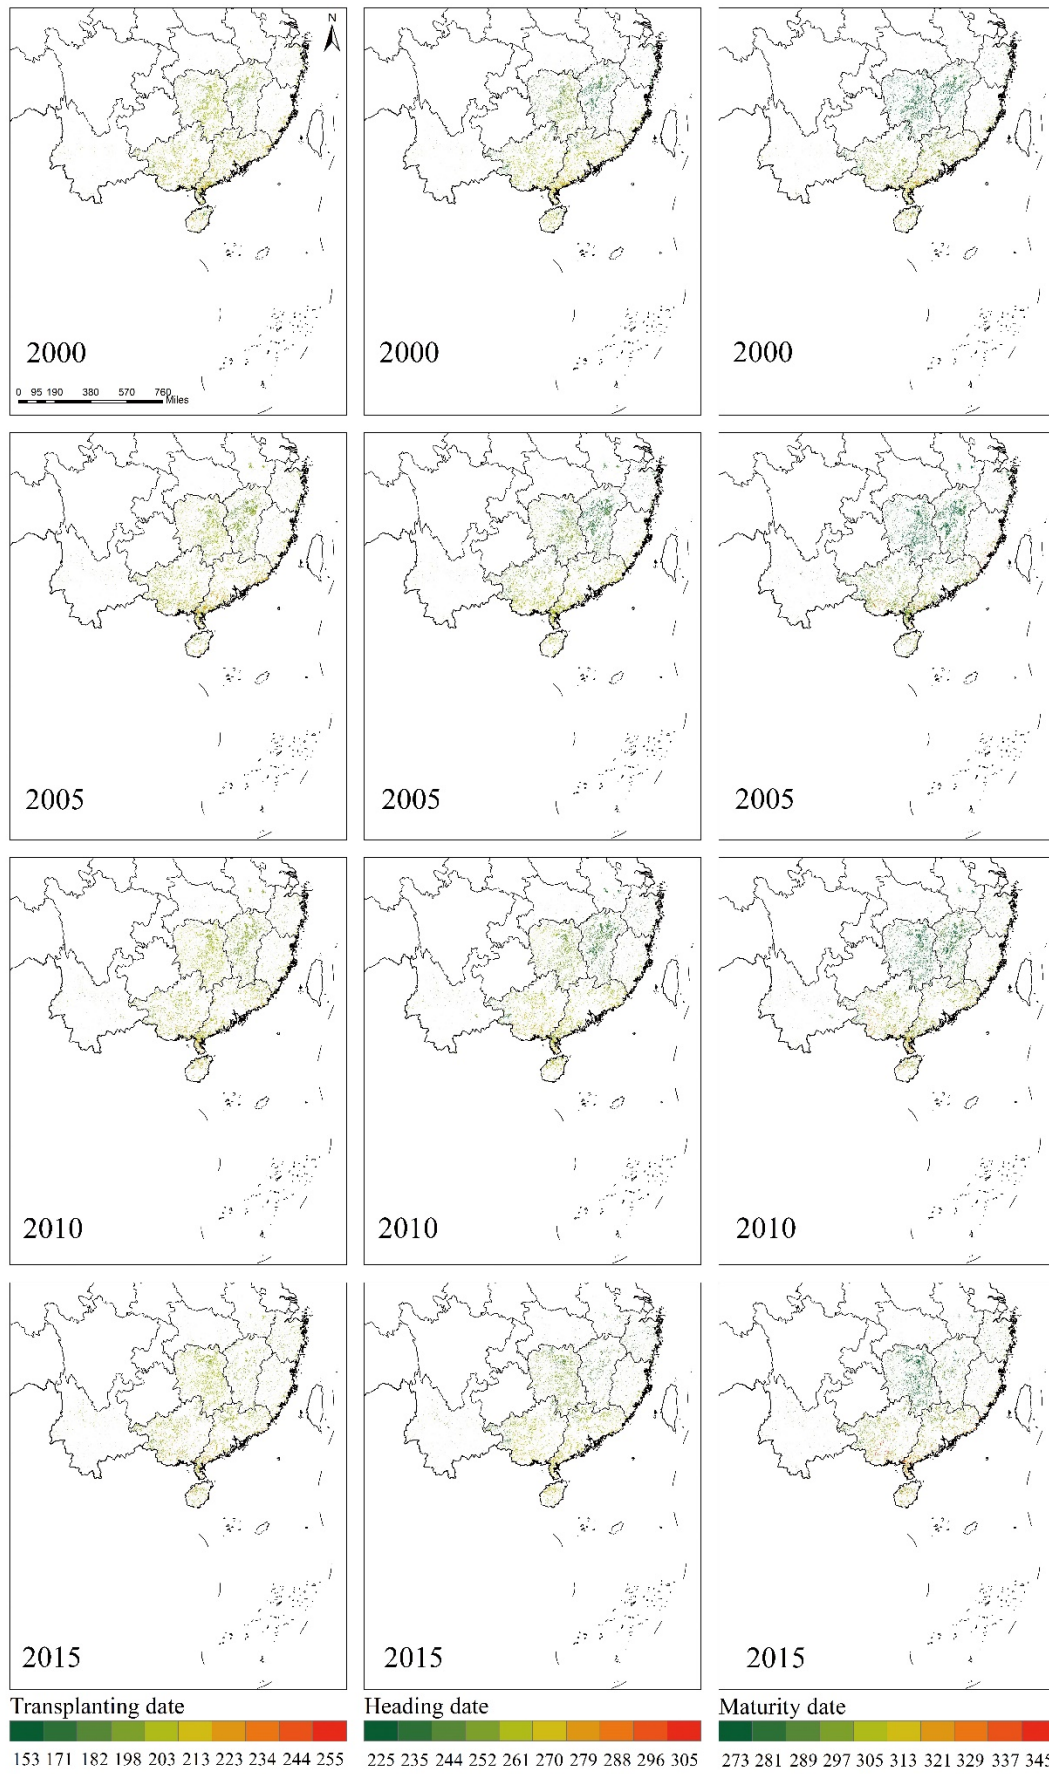

Fig. S2 Spatial patterns of annual three key phenological dates during 2000~2015 for late-rice

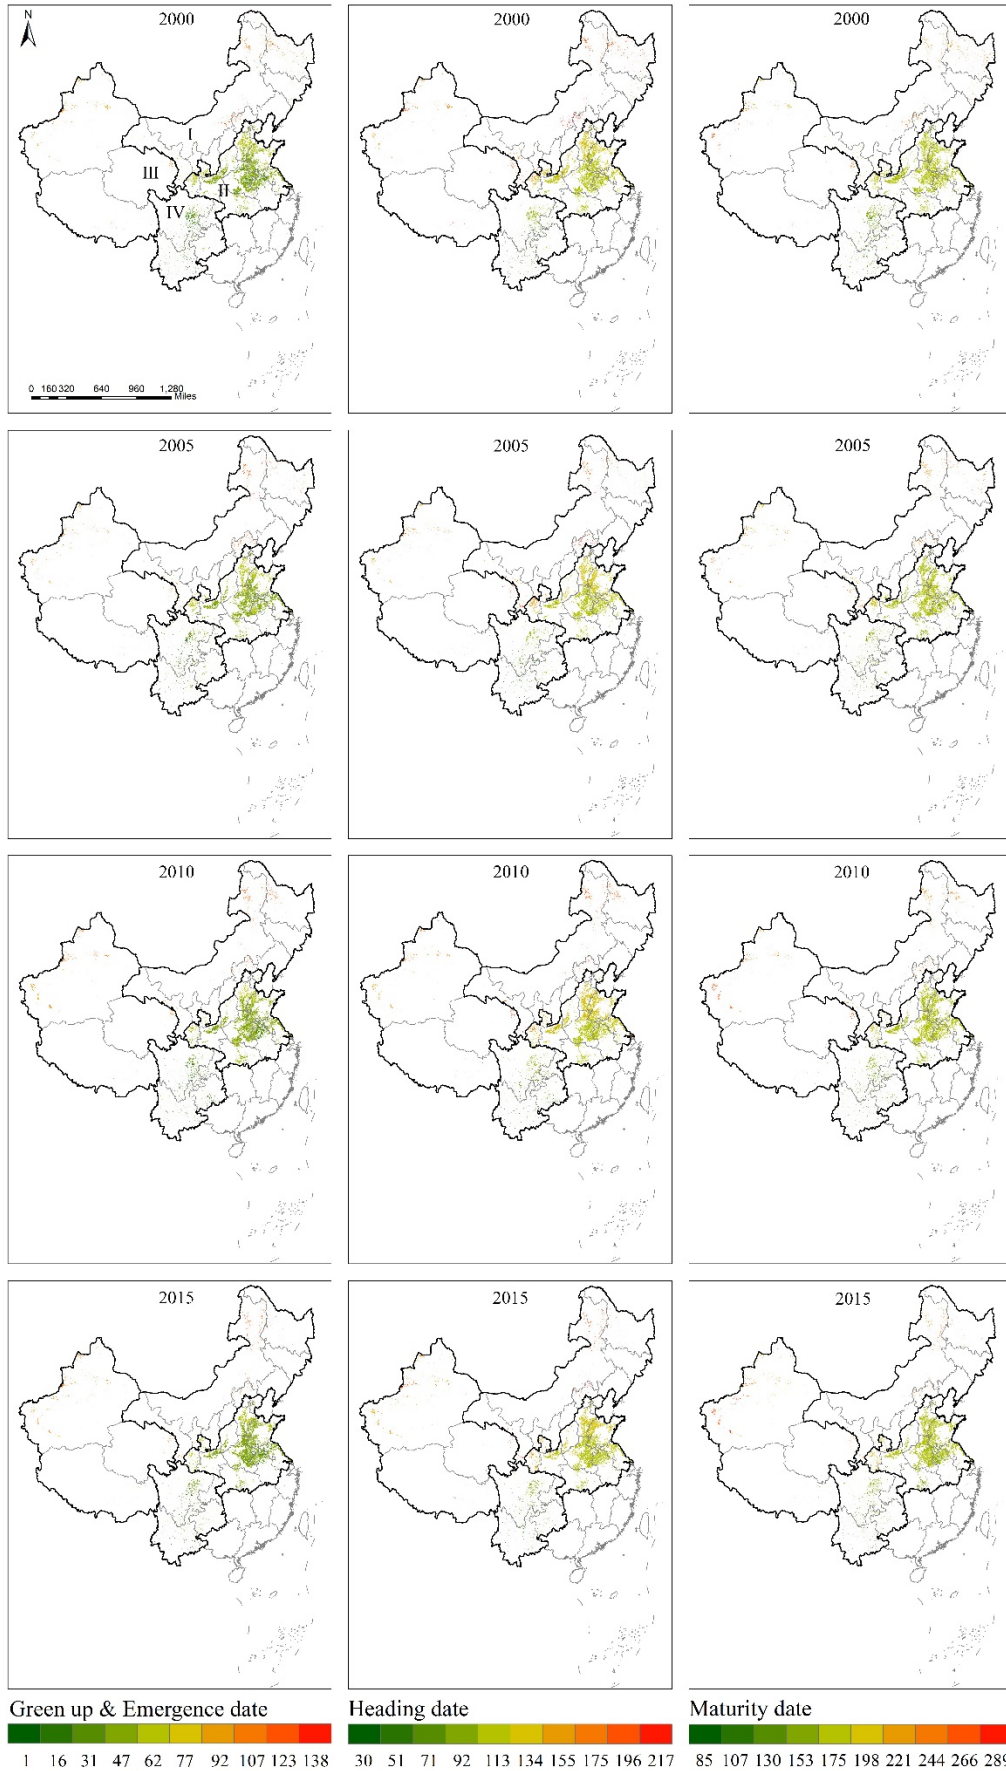

Fig. S3 Spatial patterns of annual three key phenological dates during 2000~2015 for wheat

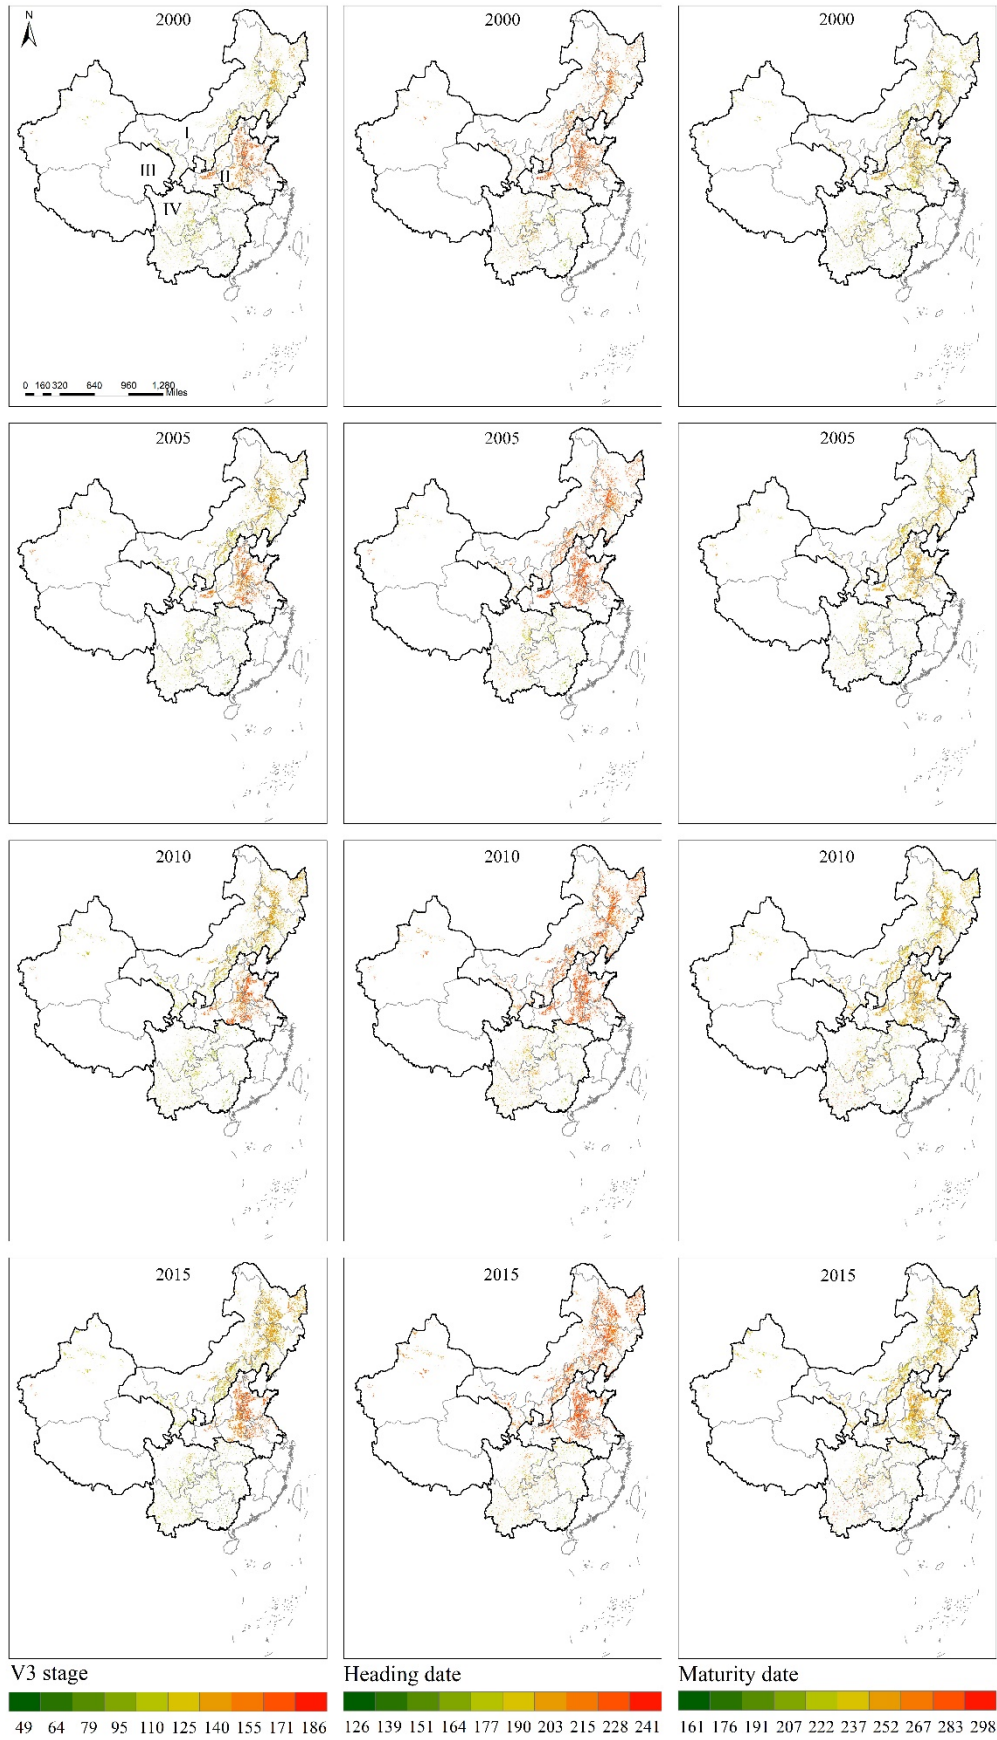

Fig. S4 Spatial patterns of annual three key phenological dates during 2000~2015 for maize
